# Supplementary material for: An atypical basement membrane forms a midline barrier during left-right asymmetric gut development in the chicken embryo
Source: eLife. 2025 Apr 29;12:RP89494. doi: 10.7554/eLife.89494 (PMC12040318; doi:10.7554/eLife.89494)
Supplement: Figure 3—source data 1. [file elife-89494-fig3-data1.xlsx]

## Sheet: laminin intensity_3I
avg laminin IF gray value (measurement described in methods)
stage	embryo #	image #	raw left mesenchyme	raw right mesenchyme	raw left coelomic epithelium bm	raw right coelomic epithelium bm	raw endoderm bm	raw midine bm	raw neural tube bm	normalized left mesenchyme	normalized right mesenchyme	normalized left coelomic epithelium bm	normalized right coelomic epithelium bm	normalized endoderm bm	normalized midine bm
hh18	1	1	156.847	155.149	314.111	292.278	313.919	262.746	415.345	0.377631	0.373543	0.756265	0.7037	0.755805	0.632597
hh18	1	2	161.708	176.558	508.96	387.367	478.895	335.644	379.543	0.42606	0.465186	1.34098	1.02062	1.26177	0.884337
hh18	1	3	144.321	184.628	411.409	523.714	435.046	574.334	479.611	0.300912	0.384954	0.857797	1.09195	0.90708	1.1975
hh18	1	4	183.642	185.538	427.14	403.861	529.171	482.051	484.137	0.379317	0.383234	0.88227	0.834187	1.09302	0.995691
hh18	1	5	213.445	166.539	287.426	447.831	345.711	368.863	398.003	0.53629	0.418437	0.722171	1.1252	0.868614	0.926783
hh18	2	1	156.039	162.601	210.707	243.24	230.706	416.566	319.668	0.488128	0.508657	0.659142	0.760913	0.721704	1.30312
hh18	2	2	171.435	176.983	253.109	288.375	360.03	293.368	320.117	0.53554	0.552871	0.790679	0.900842	1.12468	0.916441
hh18	2	3	157.112	188.165	209.992	234.527	251.328	366.613	456.379	0.344258	0.412299	0.460126	0.513887	0.5507	0.803308
hh18	2	4	176.876	145.249	291.172	299.422	270.631	756.697	503.483	0.351305	0.288488	0.578316	0.594701	0.537517	1.50292
hh18	2	5	167.826	178.313	266.645	301.994	270.146	406.439	596.02	0.281578	0.299173	0.447376	0.506685	0.45325	0.681922
hh19	1	1	246.587	234.781	555.281	482.88	594.267	390.093	565.841	0.435789	0.414924	0.981339	0.853386	1.05024	0.689403
hh19	1	2	220.526	196.093	422.563	474.996	439.502	328.239	576.313	0.38265	0.340254	0.733217	0.824198	0.76261	0.569549
hh19	1	3	187.447	209.207	464.693	450.076	441.334	461.314	540.707	0.34667	0.386914	0.859416	0.832383	0.816216	0.853168
hh19	1	4	238.663	227.476	545.917	475.782	677.111	349.317	712.24	0.335088	0.319382	0.766479	0.668008	0.950678	0.490449
hh19	1	5	193.513	223.57	492.48	394.685	453.872	384.009	569.553	0.339764	0.392536	0.864679	0.692974	0.796893	0.674228
hh19	2	1	259.833	240.333	588.951	480.763	565.404	461.653	532.05	0.488361	0.45171	1.10695	0.903605	1.06269	0.867686
hh19	2	2	225.48	190.58	546.199	569.669	624.334	488.189	542.608	0.415548	0.351229	1.00662	1.04987	1.15062	0.899709
hh19	2	3	203.605	258.071	639.442	620.945	568.822	435.182	569.506	0.357512	0.453149	1.1228	1.09032	0.998798	0.764139
hh19	2	4	217.93	199.974	527.209	582.382	597.176	385.729	454.587	0.479403	0.439903	1.15975	1.28112	1.31367	0.848526
hh19	2	5	200.314	176.961	494.847	544.8	704.739	421.137	389.883	0.513781	0.453883	1.26922	1.39734	1.80757	1.08016
hh19	3	1	211.409	180.525	512.178	554.052	463.598	286.678	586.844	0.360248	0.30762	0.872767	0.944122	0.789985	0.488508
hh19	3	2	212.006	184.645	455.122	470.949	493.606	323.726	487.263	0.435096	0.378944	0.934039	0.966519	1.01302	0.664378
hh19	3	3	225.891	176.78	634.208	578.248	427.484	393.136	486.464	0.464352	0.363399	1.30371	1.18868	0.878759	0.808151
hh19	3	4	237.408	237.517	659.153	568.842	608.535	322.381	611.573	0.388192	0.38837	1.0778	0.930129	0.995033	0.527135
hh19	3	5	254.025	209.108	615.401	553.051	556.382	333.166	517.504	0.490867	0.404071	1.18917	1.06869	1.07513	0.643794
hh20	1	1	145.777	131.978	314.694	252.544	271.946	206.224	459.352	0.317354	0.287313	0.685083	0.549784	0.592021	0.448946
hh20	1	2	135.276	123.794	242.293	254.205	172.844	158.391	420.002	0.322084	0.294746	0.576885	0.605246	0.41153	0.37712
hh20	1	3	127.182	114.903	240.906	218.465	196.029	163.866	374.872	0.339268	0.306512	0.642635	0.582772	0.522922	0.437125
hh20	1	4	122.6	125.967	196.898	219.57	151.9	146.733	291.182	0.42104	0.432604	0.6762	0.754062	0.521666	0.503922
hh20	1	5	97.1772	80.705	210.46	152.375	148.597	147.275	283.556	0.342709	0.284618	0.742217	0.537371	0.524049	0.519388
hh20	2	1	186.304	187.735	491.603	396.687	359.891	259.666	515.396	0.361477	0.364253	0.953836	0.769674	0.698281	0.503819
hh20	2	2	176.271	172.457	377.235	505.285	315.788	257.258	364.491	0.48361	0.473146	1.03497	1.38628	0.866381	0.705801
hh20	2	3	193.345	178.408	433.793	403.442	233.194	212.683	600.868	0.321776	0.296917	0.721944	0.671432	0.388095	0.353959
hh20	2	4	142.679	132.015	440.358	367.156	279.819	206.135	351.721	0.405659	0.375339	1.25201	1.04388	0.795571	0.586076
hh20	2	5	158.982	181.9	530.21	473.225	323.794	273.769	492.905	0.322541	0.369036	1.07568	0.960073	0.65691	0.555419
hh20	3	1	145.677	148.155	375.798	339.868	384.148	255.155	294.437	0.494764	0.503181	1.27633	1.1543	1.30469	0.866589
hh20	3	2	142.876	148.148	399.909	358.407	535.602	248.338	395.987	0.360811	0.374123	1.0099	0.905098	1.35257	0.627137
hh20	3	3	126.291	108.581	442.709	383.407	412.491	225.373	346.363	0.36462	0.31349	1.27816	1.10695	1.19092	0.650685
hh20	3	4	140.155	123.523	352.639	300.792	442.804	209.971	315.513	0.444214	0.3915	1.11767	0.953343	1.40344	0.66549
hh20	3	5	166.168	163.452	492.642	468.505	483.979	293.485	393.092	0.422719	0.415811	1.25325	1.19185	1.23121	0.746607
hh21	1	1	137.535	131.336	312.352	401.005	213.004	159.46	475.68	0.289133	0.276102	0.656643	0.843015	0.447789	0.335226
hh21	1	2	125.419	124.264	355.611	547.538	323.099	186.203	479.281	0.261681	0.259271	0.741968	1.14242	0.674132	0.388504
hh21	1	3	116.007	119.347	293.911	517.798	334.432	166.283	361.018	0.321334	0.330584	0.814119	1.43427	0.926358	0.460596
hh21	1	4	138.153	151.946	417.746	534.272	240.432	173.469	551.689	0.250418	0.275419	0.757213	0.968429	0.43581	0.314433
hh21	1	5	167.002	148.085	479.646	533.986	417.687	193.776	312.783	0.533923	0.473443	1.53348	1.70721	1.33539	0.619524
hh21	2	1	144.014	138.451	310.53	337.447	243.139	190.369	613.119	0.234888	0.225814	0.506476	0.550377	0.396561	0.310493
hh21	2	2	144.021	136.496	273.414	248.094	215.456	161.232	507.615	0.283722	0.268896	0.538624	0.488743	0.424447	0.317626
hh21	2	3	143.641	124.291	231.496	259.113	185.828	142.361	491.353	0.292337	0.252956	0.471139	0.527344	0.378195	0.289732
hh21	2	4	121.155	126.026	225.393	255.404	166.423	151.751	534.056	0.226858	0.23598	0.422039	0.478233	0.311621	0.284148
hh21	2	5	110.437	125.653	234.416	322.727	212.444	116.921	472.291	0.233833	0.266051	0.496338	0.683322	0.449816	0.247562

## Sheet: length_3K
slide	embryo	image	length (microns)	comments
A0	E1	1		not long enough for criteria
A0	E1	2		NA
A0	E1	3		not long enough for criteria
A0	E1	4		not long enough for criteria
A0	E1	5	8.841
A0	E1	6	15.081
A0	E1	7	14.769
A0	E1	8	19.241
A0	E1	9		NA
A1	E1	31	16.953
A1	E1	32		NA
A1	E1	33	26.938
A1	E1	34		NA
A1	E1	35		NA
A1	E1	36	28.706
A1	E1	37	31.93
A1	E1	38	43.995
A1	E1	39	53.979
A2	E1	1		stretched
A2	E1	2	43.787
A2	E1	3	43.891
A2	E1	4	44.203
A2	E1	5	55.227
A2	E1	6	53.459
A2	E1	7	45.555
A2	E1	8	51.795
A2	E1	9	59.388
A3	E1	29	61.572
A3	E1	30		poor
A3	E1	31		poor
A3	E1	32		poor
A3	E1	33		poor
A3	E1	34	58.348
A3	E1	35	56.371
A3	E1	36	61.156
A3	E1	37	68.228
A3	E1	38	79.669
A3	E1	39		poor
A0	E2	10		NA
A0	E2	11		not long enough for criteria
A0	E2	12		not long enough for criteria
A0	E2	13		not long enough for criteria
A0	E2	14		not long enough for criteria
A0	E2	15		not long enough for criteria
A0	E2	16		not long enough for criteria
A0	E2	17		not long enough for criteria
A0	E2	18		not long enough for criteria
A0	E2	19		not long enough for criteria
A1	E2	40		not long enough for criteria
A1	E2	41		not long enough for criteria
A1	E2	42		not long enough for criteria
A1	E2	43		not long enough for criteria
A1	E2	44		not long enough for criteria
A1	E2	45		not long enough for criteria
A1	E2	46	11.753
A1	E2	47	11.233
A1	E2	48	17.369
A1	E2	49	19.657
A2	E2	10	25.274
A2	E2	11	26.21
A2	E2	12	32.658
A2	E2	13	32.554
A2	E2	14	34.53
A2	E2	15	36.922
A2	E2	16	39.834
A2	E2	17	49.195
A3	E2	40		missing
A3	E2	41		missing
A3	E2	42	43.267
A3	E2	43		missing
A3	E2	44	44.203
A3	E2	45	45.451
A3	E2	46	53.459
A3	E2	47	63.236
A3	E2	48	60.012
A0	E3	20		not long enough for criteria
A0	E3	21		not long enough for criteria
A0	E3	22		not long enough for criteria
A0	E3	23		not long enough for criteria
A0	E3	24		not long enough for criteria
A0	E3	25		not long enough for criteria
A0	E3	26		not long enough for criteria
A0	E3	27		not long enough for criteria
A0	E3	28		not long enough for criteria
A0	E3	29		not long enough for criteria
A0	E3	30		not long enough for criteria
A1	E3	50		not long enough for criteria
A1	E3	51	14.041
A1	E3	52		poor
A1	E3	53	17.057
A1	E3	54	16.849
A1	E3	55	26.314
A1	E3	56	32.554
A1	E3	57	34.53
A1	E3	58	40.458
A1	E3	59	41.603
A2	E3	18	44.827
A2	E3	19	45.451
A2	E3	20	58.868
A2	E3	21	54.187
A2	E3	22	58.244
A2	E3	23	59.908
A2	E3	24	61.884
A2	E3	25	60.012
A2	E3	26	57.827
A2	E3	27		poor
A2	E3	28	65.42
A3	E3	49	67.812
A3	E3	50	73.22
A3	E3	51	65.316
A3	E3	52		aortic fusion
