# Supplementary material for: An atypical basement membrane forms a midline barrier during left-right asymmetric gut development in the chicken embryo
Source: eLife. 2025 Apr 29;12:RP89494. doi: 10.7554/eLife.89494 (PMC12040318; doi:10.7554/eLife.89494)
Supplement: Figure 4—source data 1. [file elife-89494-fig4-data1.xlsx]

## Sheet: angles_E
left coelomic epithelium	right margin cells	left margin cells	midline cells	right mesenchyme	right coelomic epithelium
260.433	150.524	231.52	131.186	1.146	300.256
324.211	212.969	160.278	204.624	0	341.565
312.614	325.244	344.055	123.69	218.928	286.44
40.601	169.509	102.2	287.879	60.709	98.82
327.131	219.56	131.186	177.064	91.548	97.253
312.337	205.602	280.081	151.113	151.189	71.313		all values are angle relative to vertical (0 to 360, clockwise)
272.981	221.82	54.866	195.376	298.811	61.928		all values represent 1 cell
41.468	230.412	80.838	294.274	23.051	95.711
299.745	236.31	81.573	216.027	313.603	342.15
11.31	227.246	316.548	270	24.102	230.194
333.435	225.546	229.635	205.602	304.992	103.191
101.47	212.535	44.293	180	130.486	60.725
35.803	74.962	226.123	187.386	60.832	141.766
325.814	226.317	10.491	149.47	50.906	340.346
356.285	73.61	278.366	313.877	123.024	234.09
284.036	214.019	243.435	341.565	90	175.101
282.265	205.974	111.251	132.879	186.459	120.466
69.341	5.906	286.189	92.603	239.534	296.565
56.041	82.648	166.399	225.764	105.524	20.171
307.185	119.055	143.297	51.892	308.157	63.435
304.641	180	220.601	93.318	83.29	26.222
284.49	149.744	203.962	318.814	312.709	215.676
275.906	151.928	314.145	158.791	180	135
126.741	324.162	206.565	151.607	174.094	270
131.257	72.255	223.877	119.134	227.386	103.671
273.18	130.601	300.379	103.627	186.52	53.973
275.262	23.749	238.782	320.793	288.435	83.853
100.305	137.603	313.636	282.926	11.31	270
122.242	309.987	214.439	244.933	304.287	268.264
319.538	322.815	229.399	325.244	25.346	146.31
223.091	88.568	341.565	333.869	46.397	102.011
279.273	117.699	256.43	319.635	197.354	66.595
233.673	122.005	264.289	36.634	238.671	35.218
318.24	116.131	227.161	176.934	156.615	39.806
11.31	347.347	138.608	98.842	138.576	255.069
169.287	100.539	130.696	149.789	0	138.576
296.565	67.068	275.262	39.369	36.87	168.232
252.801	93.013	150.255	140.29	105.945	96.613
251.175	51.009	229.97	67.671	308.454	176.532
36.529	30.7	208.474	291.801	128.66	91.432
232.028	151.113	200.659	85.452	175.914	323.973
261.203	31.866	50.906	332.676	210.141	136.273
79.54	40.365	8.13	82.333	122.347	77.005
255.018	33.69	29.249	73.887	202.834	233.881
273.013	274.236	281.689	6.843	308.66	15.255
261.754	286.39	304.16	54.728	250.346	198.925
267.474	304.695	194.534	1.023	346.43	81.384
278.584	93.576	22.203	3.731	59.931	61.783
77.619	127.569	59.744	320.711	241.39	59.808
301.185	225	11.31	343.301	191.31	98.746
250.71	197.103	337.932	339.829	221.348	71.565
257.829	302.276	337.249	323.326	130.815	90
252.15	306.87	14.323	340.56	258.69	95.315
310.711	147.995	113.962	66.666	0	274.289
289.179	315	225	155.726	0	68.199
149.036	180	165.579	298.811	164.578	32.905
278.403	353.157	145.954	298.523	82.648	70.71
297.324	218.047	112.62	327.095	64.983	321.34
236.768	230.44	152.103	321.044	142.125	115.942
102.848	188.13	56.768	70.641	93.945	108.925
321.072	129.289	132.879	55.981	148.736	306.87
21.371	61.557	311.424	77.005	15.945	58.736
277.431	180	111.801	214.592	110.136	270
275.877	136.332	79.992	106.991	70.017	113.385
310.601	150.751	48.18	46.736	164.745	95.528
190.784	212.005	72.897	94.764	216.573	354.289
151.557	342.897	308.047	122.735	186.009	342.35
265.314	243.435	322.696	107.784	242.65	172.569
236.689	208.887	106.504	274.399	127.235	92.386
32.661	223.531	79.992	258.518	80.218	41.496
264.289	319.899	196.144	274.97	0	239.744
303.69	31.264	13.392	100.62	68.839	127.451
5.711	162.35	203.962	199.654	262.093	76.373
341.565	285.255	270	272.175	236.889	275.44
273.18	287.447	278.746	267.064	53.427	41.186
244.699	113.962	127.235	121.866	86.309	90
267.337	93.366	127.569	114.702	104.534	94.865
61.39	180	284.036	300.7	133.025	100.713
282.804	94.399	146.31	92.793	276.582	95.711
81.87	42.51	26.565	59.931	90	51.009
308.367	19.654	357.51	209.982	15.068	106.991
307.875	47.291	170.218	99.819	34.38	96.226
323.13	282.529	17.103	145.008	15.422	135
242.745	77.471	358.29	291.801	207.35	73.496
312.614	105.524	278.616	0	26.565	172.405
279.926	127.235	187.595	29.249	167.276	239.036
198.886	90	160.201	26.565	266.82	275.826
234.462	131.634	27.255	273.576	342.897	209.539
167.125	306.254	275.595	127.875	74.476	136.548
174.289	90	302.344	185.711	111.801	171.469
297.824	283.134	44.485	43.264	115.71	180
197.241	55.176	278.807	201.161	120.7	279.462
272.386	5.528	342.813	213.111	90	291.038
195.642	351.027	63.708	283.57	115.602	317.643
276.459	65.225	332.439	309.611	350.91	170.38
325.176	358.21	123.528	0	101.976	255.343
289.983	23.749	290.189	270	334.885	90.868
302.005	17.745	82.733	232.125	29.055	94.514
297.801	18.435	178.287	61.699	99.462	91.45
292.62	338.499	231.706	43.315	30.964	85.815
308.29	324.689	340.942	337.521	238.392	90
258.69	357.955	99.271	256.504	131.055	45
300.114	9.211	95.285	342.35	283.707	82.648
217.185	323.471	95.042	128.454	122.619	116.2
82.235	238.392	291.707	159.59	213.179	300.192
41.987	100.244	234.709	197.354	102.381	88.854
327.995	277.607	260.181	326.31	144.728	63.97
270	301.863	230.194	358.636	115.388	340.346
306.724	208.61	236.06	51.71	303.311	334.398
111.801	108.435	300.735	213.69	248.749	356.634
270	125.218	123.23	153.435	136.909	291.251
289.983	252.897	225.744	329.676	277.765	52.306
300.964	259.781	56.95	109.179	43.264	36.87
320.826	162.719	244.44	98.746	128.29	84.71
278.881	144.924	108.759	114.842	125.676	292.989
126.87	203.227	278.881	90	152.879	248.839
89.349	302.735	280.153	308.884	102.011	201.571
248.499	131.069	323.902	300.256	302.4	122.905
266.711	354.806	209.745		181.193	129.207
247.38	177.51	78.518		225.909	252.897
269.029	5.185	47.045		279.462	99.62
115.641	237.952	228.575		326.634	58.671
251.565	286.209	34.439		232.524	0
289.983	43.733	109.654		164.932	63.97
306.254	194.044	278.276			85.795
338.499	251.301	82.488		136.123	65.323
253.811	204.491	81.724		276.34	104.036
289.44	47.882	24.146		148.671	117.15
270	214.461	337.631		128.928	83.157
90	205.463	167.926		252.897	24.624
138.122	97.696	206.565		173.089	269.091
268.668	116.114	277.172		121.608	76.239
65.433	53.837	279.109		156.615	46.888
250.71	226.591	274.185		147.095	230.477
204.305	30.873	284.5		288.925	76.373
254.055	227.432	50.194		0	66.14
129.987	315.368	292.891		105.422	62.592
62.103	45.785	79.461		299.745	275.711
301.43	66.425	264.042		94.764	81.254
218.66	321.307	193.173		296.565	38.884
209.982	300.801	168.69		156.501	90
84.472	215.676	201.207		210.964	324.782
325.359	198.06	299.993		270	286.798
302.661	293.666	232.253		91.736	305.789
308.418	331.411	111.571		131.424	80.34
259.216	209.055	34.287		263.991	75.203
296.114	128.501	337.306		338.199	92.862
314.091	46.713	103.804		137.726	13.799
279.926	285.562	77.381		142.815	232.374
358.264	74.667	237.529		96.009	13.173
332.241	52.421	215.707		297.181	339.717
118.443	50.528	202.62		0	117.3
190.125	224.334	14.484		69.624	244.359
257.735	70.974	62.605		37.694	69.624
100.539	303.024	9.866		1.432	72.897
118.811	109.44	243.869		321.116	127.747
202.834	236.976	233.393		147.426	90
246.975	96.843	136.975		36.254	336.038
247.286	271.848	41.532		54.09	8.584
239.036	18.435	45.909		336.038	16.991
262.875	198.435	283.95		321.072	29.476
40.101	329.036	73.61		345.964	1.736
249.775	106.46	156.251		23.499	105.124
216.87	279.273	253.159		3.27	14.931
214.695	19.44	319.574		126.87	98.973
69.228	50.826	50.964		278.326	74.358
200.136	157.479	317.408		248.962	91.219
243.435	225	131.348		47.816	9.162
104.621	144.156	331.821		49.844	348.111
120.069	239.199	36.87		294.775	101.041
275.356	94.844	283.48		177.138	62.301
279.462	71.373	268.21		136.931	37.476
64.537	95.315	338.552		318.731	120.964
260.838	53.881	154.654		225	188.881
315	193.57	75.763		270	81.607
122.005	132.51	26.565		222.138	178.363
96.911	275.128	296.565		51.34	142.595
313.668	19.134	39.958		270	209.982
290.973	301.799	105.124		154.885	287.879
299.982	130.156	40.426		90	334.093
282.155	34.136	226.005		357.397	225.971
324.638	146.041	12.625		147.529	62.879
302.005	288.034	82.147		238.241	80.311
105.642	302.829	208.861		113.552	355.601
77.471	94.245	201.501		139.635	270
304.548	43.409	291.171		165.53	74.578
267.316	189.934	104.676		136.169	30.466
234.246	46.79	333.435		47.911	50.194
283.276	316.042	70.758		167.905	180
98.616	27.897	332.241		123.69	51.667
311.055	144.866	265.601		308.157	75.619
285.524	294.133	104.036		88.568	259.695
203.703	294.905	74.476		90	90.764
299.745	120.964	235.008		98.13	27.897
266.82	60.068	43.995		35.754	14.697
286.821	46.975	321.52		24.146	188.807
255.466	42.558	65.772		195.255	305.096
268.315	224.119	200.304		253.811	30.964
201.251	43.781	207.178		162.255	266.987
109.537	217.747	304.91		239.036	18.947
190.305	90	190.808		98.427	292.068
93.576	71.003	338.806		180	80.789
38.157	42.614	70.023		190.784	132.397
261.027	238.671	326.069		326.31	325.222
30.964	103.431	58.067		259.695	102.758
253.74	131.379	309.56		240.751	213.996
120.964	191.31	112.41		7.125	24.59
307.304	49.939	86.532		113.429	103.092
255.53	42.436	99.638		12.529	265.365
	260.707	286.232		268.025	57.171
	194.036	64.057		9.462	9.728
	125.096	191.802		38.66	38.853
	192.407	156.666		96.34	78.024
	207.699	84.196		324.462	82.694
	73.179	282.79		158.552	31.504
	214.902	31.506		333.034	54.293
	217.782	70.514		295.53	96.789
	188.569	50.648		295.233	90
	239.921	152.176		344.476	76.931
	74.476	263.099		253.034	67.479
	202.442	21.005		133.755	106.966
	11.07	217.528		94.97	68.749
	113.356	185.344		10.389	114.677
	214.077	82.719		327.2	40.314
	235.056	86.496		308.501	113.962
	160.75	15.055		276.667	83.66
	29.745	135.822		336.194	325.176
	220.179	219.352		282.995	95.194
	300.964	196.39		90	180
	217.232	146.575		133.958	96.459
	73.072	150.344		97.496	63.094
	107.7	137.819		67.964	39.401
	257.229	90		125.538	225
	291.508	56.31		317.911	317.936
	305.682	156.218		41.878	337.913
	89.642	356.699		264.428	99.819
	352.185	65.695		54.689	34.439
	173.991	31.92		238.392	165.964
	34.854	316.736		156.038	116.003
	294.426	144.904		301.185	85.764
	137.579	236.184		242.526	85.03
	302.654	341.565		117.15	281.842
	267.323	236.535		174.611	148.815
	349.919	271.71		167.152	99.66
	10.176	216.254		227.291	108.97
	333.893	192.503		81.724	281.889
	19.25	75.6		293.385	70.88
	132.543	226.737		298.142	111.194
	142.792	142.97		144.162	87.51
	113.208	26.232		105.819	245.323
	199.933	8.13		270	309.987
	290.695	21.337		318.013	93.945
	51.461	347.585		128.853	72.699
	229.983	296.114		279.462	287.241
	90	71.03		135.971	289.983
	223.995	234.689		223.781	284.589
	291.14	154.326		23.429	302.829
	136.681	274.447		157.751	40.503
	318.013	281.143		227.49	92.045
	250.665	306.254		90	85.533
	43.315	301.701		135	71.075
	250.346	232.927		158.839	101.094
	348.629	321.116		133.727	148.627
	236.631	84.401		228.013	35.538
	303.659	336.484		162.181	110.283
	163.357	14.036		80.538	268.919
	294.775	119.291		253.072	101.56
	290.421	302.829		237.095	208.61
	337.605	246.902		322.125	106.113
	353.946	318.24		172.304	71.565
	254.495	307.185		104.47	121.866
	102.407	164.939		111.541	140.194
	141.582	308.66		262.147	101.56
	24.829	272.045		303.341	182.386
	288.726	203.839		87.797	189.246
	228.504	222.51		297.824	169.38
	40.601	17.476		218.089	180
	152.745	300.964		266.186	90
	23.025	118.443		56.023	73.124
	41.348	331.699		349.16	87.663
	28.843	14.502		318.691	82.439
	351.529	303.275		276.71	80.64
	190.465	196.46		104.036	308.797
	6.766	350.754		314.119	296.565
	21.801	278.973		65.136	187.97
	19.855	159.044		242.969	304.902
	349.461	198.229		134.31	328.134
	42.624	358.668		322.224	82.614
	266.906	132.825		357.754	95.194
	279.605	49.399		321.52	158.839
	266.203	350.311		137.291	111.801
	319.268	122.905		20.225	126.87
	122.735	35.538		0	585.855
	20.695	295.201		145.67	335.879
	258.69	195.367		61.074	128.48
	17.441	135.881		288.138
	327.095	262.488		121.43
	174.936	277.496		340.463
	32.152	242.879		238.241
	17.63	139.086		91.123
	76.827	298.856		144.462
	270	17.819		42.769
	91.245	305.538		95.599
	299.168	283.671		154.916
	248.012	228.013		142.431
	67.38	54.866		128.66
	49.336	243.435		225
	221.97	137.42		15.173
	123.225	43.242		316.909
	210.379	44.119		244.983
	249.717	45.893		96.483
	49.764	268.713		83.66
	331.607	240.803		137.203
	11.592	340.498		353.48
	315	73.072		15.124
	351.577	213.111		90
	275.856	58.627		118.968
	192.529	318.576		261.724
	347.661	51.667		83.66
	160.641	181.79		266.424
	305.134	74.745		245.898
	161.175	119.358		278.842
	327.653	205.129		295.641
	135.711	260.727		48.945
	345.964	30.964		155.298
	194.731	43.363		19.885
	194.002	101.31		158.552
	227.603	358.854		355.333
	50.906	214.439		119.197
	321.633	262.875		149.036
	320.194	95.335		86.698
	213.69	329.495		316.79
	161.565	130.314		251.095
	305.433	140.528		0
	240.422	197.91		212.276
	27.979	325.856		0
	307.569	146.041		316.123
	312.51	326.31		249.326
	330.461	352.439		127.725
	100.773	336.161		22.521
	129.174	141.633		228.731
	229.844	318.366		135.785
	25.346	19.983		314.091
	328.671	266.009		6.882
	319.528	216.87		3.991
	142.815	244.486		280.389
	156.387			129.019
	138.24			201.125
	207.15			106.26
	248.792			294.444
	28.211			160.145
	291.801			294.677
	329.036			53.366
	110.826			64.799
	164.055			236.821
	307.476			270
	300.466			92.203
	56.31			129.806
	340.574			155.854
	295.821			265.601
	186.715			299.539
	233.91			270
	90.815			46.637
	81.347			150.945
	207.326			113.962
	272.121			228.814
	226.163			302.196
	230.906			115.602
	108.219			3.468
	346.701			206.095
	353.66			317.603
	22.38			287.281
	49.764			336.448
	147.45			250.769
	9.926			77.661
	212.005			63.435
	210.812			4.399
	193.392			53.881
	80.311			358.152
	172.333			56.31
	78.69			105.173
	85.101			315
	224.113			127.476
	33.024			171.87
	231.911			308.367
	234.638			159.444
	199.335			103.627
	222.709			106.821
	237.804			337.249
	135			354.094
	114.743			102.995
	64.537			206.565
	152.819			3.576
	252.064			117.979
	156.571			270
	160.56			239.3
	208.918			235.62
	358.727			180
	117.35			341.075
	203.199			228.24
	66.371			240.124
	302.606			270
	249.444			347.905
	330.945			324.462
	349.495			23.429
	66.93			65.225
	128.234			164.578
	112.011			96.911
	329.859			18.435
	252.031			241.39
	294.944			133.452
	270			120.964
				300.964
				235.886
				316.081
				352.304
				289.799
				108.853
				67.38
				344.846
				180
				327.529
				287.969
				102.381
				252.35
				214.992
				270
				355.101
				103.449
				320.528
				294.075
				262.057
				292.166
				0
				270
				288.435
				278.13
				304.16
				331.557
				178.025
				182.01
				131.906
				232.306
				288.004
				134.061
				117.646
				25.408
				136.909
				139.399
				53.973
				8.427
				36.87
				107.199
				172.405
				283.496
				117.646
				180
				292.932
				158.682
				311.987
				165.069
				0
				204.677
				171.254
				345.964
				150.422
				127.304
				85.426
				323.746
				350.538
				327.724
				106.858
				197.103
				294.905
				166.504
				11.31
				246.038
				172.405
				90
				205.56
				124.695
				98.366
				180
				326.821
				328.782
				126.87
				51.911
				161.175
				340.017
				333.435
				29.745
				352.875
				18.06
				34.875
				354.685
				186.34
				38.29
				14.621
				234.689
				296.565
				77.471
				56.689
				325.008
				13.707
				90
				322.696
				354.094
				108.97
				143.746
				110.854
				118.393
				146.31
				215.676
				305.362
