# Supplementary material for: An atypical basement membrane forms a midline barrier during left-right asymmetric gut development in the chicken embryo
Source: eLife. 2025 Apr 29;12:RP89494. doi: 10.7554/eLife.89494 (PMC12040318; doi:10.7554/eLife.89494)
Supplement: Figure 6—source data 1. [file elife-89494-fig6-data1.xlsx]

## Sheet: Dextran_6G
stage	embryo #	photo #	# L cells	# R cells	Total L cells	Total R cells	Proportion cells on R	Proportion cells on L
HH19	6.1	5	0	4	0	56	1	0
		6	0	26
		7	0	17
		8	0	9
	6.12	17	0	39	1	166	0.994012	0.00598802
		18	0	42
		19	0	31
		20	0	23
		21	1	31
	6.13	33	0	21	1	88	0.988764	0.011236
		34	1	33
		35	0	28
		36	0	6
	6.2	41	0	21	0	89	1	0
		42	0	29
		43	0	36
		44	0	3
HH20	6.6	1	0	12	1	64	0.984615	0.0153846
		2	1	26
		3	0	22
		4	0	4
	6.21	45	0	21	0	21	1	0
	6.24	53	0	11	0	154	1	0
		54	0	30
		56	0	39
		57	0	39
		58	0	29
		59	0	6
	5.2	3	5	24	8	38	0.826087	0.173913
		4	3	14
	5.4	12	0	9	8	62	0.885714	0.114286
		13	0	27
		14	3	18
		15	0	6
		16	5	2
	5.5	20	0	14	23	141	0.859756	0.140244
		21	0	15
		22	0	17
		23	5	41
		25	11	30
		26	4	17
		27	3	7
	5.21	38	3	38	17	43	0.716667	0.283333
		40	12	5
		41	2	0
	5.22	43	5	13	19	45	0.703125	0.296875
		44	5	18
		45	9	14
HH23/24	7.11	12	17	5	75	145	0.659091	0.340909
		13	19	14
		14	20	15
		16	5	22
		17	3	34
		18	4	36
		19	7	19
	7.15	27	4	14	47	127	0.729885	0.270115
		28	12	20
		29	0	16
		30	0	22
		31	12	31
		32	19	24
	7.16	33	1	12	53	68	0.561983	0.438017
		40	4	19
		41	26	10
		42	22	27
	7.17	52	0	25	40	80	0.666667	0.333333
		53	11	25
		54	24	22
		55	5	8
	7.19	56	13	14	81	288	0.780488	0.219512
		57	5	21
		58	5	36
		59	13	57
		60	7	54
		61	9	47
		62	7	25
		63	11	20
		64	11	14
	7.21	65	9	9	135	120	0.470588	0.529412
		66	46	28
		67	23	29
		68	30	25
		69	27	29
	7.22	70	26	0	114	117	0.506494	0.493506
		71	41	2
		72	40	33
		73	5	25
		74	2	24
		75	0	21
		76	0	12

## Sheet: BODdiffusion_6J
stage	embryo #	image #	left avg	right avg	noto avg	L noto correc	R noto correc	R:L avg ratio
hh19	1	19	546.601	353.994	195.639	350.962	158.355	0.451203
hh19	1	13	426.941	333.329	236.956	189.985	96.3729	0.507266
hh19	1	14	347.624	246.268	239.644	107.98	6.62431	0.0613479
hh19	1	18	364.209	230.227	217.348	146.861	12.8794	0.0876976
hh19	2	9	1399.48	1128.51	843.622	555.858	284.892	0.512526
hh19	2	8	1102.78	469.415	429.419	673.357	39.9955	0.0593972
hh19	2	11	495.337	254.883	209.402	285.935	45.4806	0.159059
hh19	3	13	1000.53	354.722	353.215	647.311	1.50671	0.00232765
hh19	3	8	864.566	603.893	326.36	538.206	277.533	0.515663
hh19	3	9	1223.33	888.314	817.734	405.591	70.5804	0.174019
hh19	3	12	793.504	564.918	460.872	332.632	104.046	0.312795
hh19	4	26	505.16	380.392	240.503	264.657	139.889	0.528567
hh19	4	27	806.331	376.778	336.404	469.927	40.3744	0.0859161
hh19	4	29	920.008	481.93	369.517	550.491	112.413	0.204205
hh19	4	30	947.049	516.697	258.223	688.826	258.474	0.375238
hh19	4	24	915.894	553.457	397.674	518.22	155.783	0.300612
hh21	1	14	607.389	606.392	316.625	290.764	289.767	0.996572
hh21	1	17	1266.95	1436.19	559.804	707.148	876.381	1.23932
hh21	1	16	227.298	223.549	97.156	130.142	126.393	0.971198
hh21	2	21	249.211	209.944	86.101	163.11	123.843	0.759263
hh21	2	19	368.075	322.682	122.445	245.63	200.237	0.815197
hh21	2	22	180.169	203.191	72.692	107.477	130.499	1.2142
hh21	2	18	275.959	232.128	97.511	178.448	134.617	0.754377
hh21	3	4	231.158	193.71	76.02	155.138	117.69	0.758619
hh21	3	3	374.237	306.841	120.155	254.082	186.686	0.734746
hh21	3	5	328.922	340.084	118.99	209.932	221.094	1.05317

## Sheet: IntensityPlot_6KL
hh19, embryo 1, image 18			data for 6K						hh21, embryo 2, image 22			data for 6L
Distance_(microns)	raw bodipy	raw laminin	bodipy normalized to notochord	noto avg	217.348				Distance_(microns)	raw bodipy	raw laminin	bodipy normalized to notochord	noto avg	72.692
0	370.394	741.956	153.046						0	708.622	211.064	138.372
0.664	344.999	712.156	127.651						0.83	732.195	207.266	134.574
1.328	310.974	630.291	93.626						1.661	744.854	197.157	124.465
1.993	297.276	589.965	79.928						2.491	798.888	189.794	117.102
2.657	287.606	572.581	70.258						3.321	889.91	187.457	114.765
3.321	294.356	576.481	77.008						4.151	902.697	194.521	121.829
3.985	309.446	589.308	92.098						4.982	876.247	195.045	122.353
4.649	323.671	593.287	106.323						5.812	884.022	197.24	124.548
5.314	358.117	615.434	140.769						6.642	887.195	204.637	131.945
5.978	402.902	691.213	185.554						7.472	920.929	219.835	147.143
6.642	451.695	775.19	234.347						8.303	995.607	226.461	153.769
7.306	474.579	809.14	257.231						9.133	1033.94	216.375	143.683	left coelomic BM
7.971	499.386	860.918	282.038						9.963	1016.21	211.079	138.387
8.635	515.189	939.568	297.841						10.793	1004.62	214.337	141.645
9.299	559.243	999.563	341.895						11.624	1012.19	211.861	139.169
9.963	590.785	1013.01	373.437						12.454	986.326	205.944	133.252
10.627	595.447	1013.38	378.099	left coelomic BM					13.284	915.101	200.674	127.982
11.292	571.828	990.899	354.48						14.115	845.476	199.157	126.465
11.956	523.478	923.277	306.13						14.945	774.824	186.397	113.705
12.62	466.867	845.6	249.519						15.775	744.453	179.622	106.93
13.284	423.669	790.557	206.321						16.605	742.846	181.745	109.053
13.948	407.534	749.371	190.186						17.436	667.603	187.101	114.409
14.613	409.448	738.184	192.1						18.266	644.816	188.491	115.799
15.277	427.286	762.662	209.938						19.096	647.27	178.592	105.9
15.941	426.088	785.039	208.74						19.926	670.974	170.839	98.147
16.605	421.459	771.387	204.111						20.757	731.959	170.835	98.143
17.27	426.163	767.373	208.815						21.587	774.423	175.655	102.963
17.934	424.21	794.058	206.862						22.417	805.88	181.569	108.877
18.598	459.616	846.604	242.268						23.247	787.944	183.978	111.286
19.262	476.632	918.703	259.284						24.078	736.719	169.266	96.574
19.926	495.172	959.19	277.824						24.908	692.375	157.7	85.008
20.591	469.775	935.232	252.427						25.738	649.85	153.386	80.694
21.255	436.097	888.643	218.749						26.569	668.408	159.787	87.095
21.919	416.495	848.782	199.147						27.399	677.146	160.768	88.076
22.583	379.206	807.878	161.858						28.229	684.794	153.195	80.503
23.247	362.651	763.365	145.303						29.059	662.36	147.3	74.608
23.912	344.297	712.357	126.949						29.89	653.228	147.281	74.589
24.576	334.546	678.461	117.198						30.72	648.614	151.978	79.286
25.24	309.349	635.467	92.001						31.55	660.187	159.06	86.368
25.904	283.669	588.449	66.321						32.38	673.562	167.431	94.739
26.569	292.07	577.943	74.722						33.211	709.236	166.839	94.147
27.233	314.831	603.61	97.483						34.041	755.959	165.921	93.229
27.897	334.918	651.579	117.57						34.871	787.517	162.809	90.117
28.561	363.152	701.292	145.804						35.701	773.442	165.794	93.102
29.225	367.002	732.679	149.654						36.532	793.232	173.247	100.555
29.89	390.119	748.643	172.771						37.362	774.884	181.607	108.915
30.554	389.781	760.934	172.433						38.192	770.577	184.139	111.447
31.218	369.18	751.764	151.832						39.022	749.948	178.502	105.81
31.882	346.396	732.492	129.048						39.853	798.659	184.464	111.772
32.546	348.389	703.332	131.041						40.683	836.94	187.547	114.855
33.211	345.511	701.645	128.163						41.513	862.386	191.318	118.626
33.875	341.514	691.616	124.166						42.344	867.019	199.667	126.975
34.539	345.25	697.021	127.902						43.174	856.037	200.734	128.042
35.203	347.082	710.953	129.734						44.004	809.082	194.528	121.836
35.867	331.217	703.63	113.869						44.834	793.498	187.09	114.398
36.532	342.46	685.577	125.112						45.665	793.906	179.476	106.784
37.196	342.948	669.486	125.6						46.495	779.543	184.966	112.274
37.86	319.226	643.342	101.878						47.325	755.592	179.431	106.739
38.524	306.77	600.261	89.422						48.155	729.974	168.004	95.312
39.189	315.151	575.636	97.803						48.986	719.464	155.086	82.394
39.853	299.367	566.852	82.019						49.816	729.921	158.371	85.679
40.517	276.927	552.102	59.579						50.646	736.899	172.079	99.387
41.181	262.826	534.923	45.478						51.476	795.88	184.116	111.424
41.845	255.59	527.097	38.242						52.307	783.434	187.341	114.649
42.51	258.634	511.037	41.286						53.137	787.981	186.816	114.124
43.174	277.57	510.814	60.222						53.967	793.345	187.135	114.443
43.838	284.988	530.654	67.64						54.798	758.865	190.139	117.447
44.502	292.145	552.898	74.797						55.628	712.124	189.846	117.154
45.166	300.341	572.429	82.993						56.458	712.464	189.667	116.975
45.831	310.063	584.321	92.715						57.288	741.906	196.854	124.162
46.495	324.724	610.335	107.376						58.119	707.461	198.963	126.271
47.159	323.282	637.892	105.934						58.949	691.873	186.404	113.712	midline BM
47.823	324.596	646.384	107.248						59.779	685.532	178.431	105.739
48.488	328.832	648.915	111.484						60.609	704.682	179	106.308
49.152	345.707	653.133	128.359						61.44	688.011	172.521	99.829
49.816	337.678	643.697	120.33						62.27	729.903	172.993	100.301
50.48	323.739	629.606	106.391						63.1	785.022	172.419	99.727
51.144	339.601	635.292	122.253						63.93	781.416	181.757	109.065
51.809	344.135	651.982	126.787						64.761	814.831	188.434	115.742
52.473	332.646	662.061	115.298						65.591	831.551	192.176	119.484
53.137	332.312	652.276	114.964						66.421	830.296	192.79	120.098
53.801	324.966	629.83	107.618						67.252	837.648	198.375	125.683
54.465	315.274	627.768	97.926						68.082	786.562	194.618	121.926
55.13	332.783	645.263	115.435						68.912	730.21	185.532	112.84
55.794	337.243	677.211	119.895						69.742	737.67	203.434	130.742
56.458	329.797	686.855	112.449						70.573	779.715	215.157	142.465
57.122	332.941	679.041	115.593						71.403	808.457	214.498	141.806
57.787	353.286	668.559	135.938						72.233	897.843	225.734	153.042
58.451	362.964	690.526	145.616						73.063	945.157	233.85	161.158
59.115	363.412	701.606	146.064						73.894	909.251	234.509	161.817
59.779	357.697	716.394	140.349						74.724	908.184	242.734	170.042
60.443	350.38	719.497	133.032						75.554	897.24	237.393	164.701
61.108	352.198	685.558	134.85						76.384	865.112	238.172	165.48
61.772	376.047	698.817	158.699						77.215	849.071	249.386	176.694
62.436	376.294	726.581	158.946						78.045	887.303	261.476	188.784
63.1	377.818	740.82	160.47						78.875	888.135	254.955	182.263
63.764	367.754	748.999	150.406						79.706	906.659	243.101	170.409
64.429	356.224	747.647	138.876						80.536	915.592	247.652	174.96
65.093	356.596	748.458	139.248						81.366	925.509	252.408	179.716
65.757	350.893	742.854	133.545						82.196	907.547	242.745	170.053
66.421	359.594	748.629	142.246						83.027	900.019	236.468	163.776
67.085	364.574	750.494	147.226						83.857	862.142	219.966	147.274
67.75	349.249	718.721	131.901						84.687	808.708	209.052	136.36
68.414	354.305	704.427	136.957						85.517	785.655	201.21	128.518
69.078	377.848	731.653	160.5						86.348	789.85	193.978	121.286
69.742	384.711	746.125	167.363						87.178	827.303	188.517	115.825
70.407	396.577	742.765	179.229						88.008	869.895	186.27	113.578
71.071	411.787	758.558	194.439						88.838	881.39	181.049	108.357
71.735	410.664	771.154	193.316						89.669	849.36	174.011	101.319
72.399	420.969	793.938	203.621						90.499	837.202	173.888	101.196
73.063	403.671	805.668	186.323						91.329	823.539	171.869	99.177
73.728	372.158	746.873	154.81						92.16	855.674	171.745	99.053
74.392	346.476	693.349	129.128						92.99	843.116	179.094	106.402
75.056	333.146	655.1	115.798						93.82	868.461	191.674	118.982
75.72	306.355	617.507	89.007						94.65	891.959	198.427	125.735
76.384	296.551	606.664	79.203						95.481	858.831	191.386	118.694
77.049	311.43	629.657	94.082						96.311	856.528	195.419	122.727
77.713	327.28	673.235	109.932						97.141	879.685	206.191	133.499
78.377	346.727	706.885	129.379						97.971	833.768	208.966	136.274
79.041	329.855	702.42	112.507						98.802	818.03	204.112	131.42
79.706	308.109	673.824	90.761						99.632	780.734	204.543	131.851
80.37	306.554	638.925	89.206						100.462	751.423	209.434	136.742
81.034	301.497	628.855	84.149						101.292	792.221	213.816	141.124
81.698	312.215	647.497	94.867						102.123	839.064	206.843	134.151
82.362	321.034	645.053	103.686						102.953	863.551	194.573	121.881
83.027	323.304	657.113	105.956						103.783	845.214	186.858	114.166
83.691	326.188	664.561	108.84						104.613	860.228	189.652	116.96
84.355	323.467	639.255	106.119						105.444	868.528	183.468	110.776
85.019	323.448	615.101	106.1						106.274	929.566	179.221	106.529
85.683	330.154	610.146	112.806						107.104	1017.18	179.64	106.948
86.348	333.015	611.189	115.667						107.935	1084.36	183.846	111.154
87.012	339.425	617.016	122.077						108.765	1134.24	186.79	114.098	right coelomic BM
87.676	336.545	617.735	119.197						109.595	1087.7	189.36	116.668
88.34	344.013	622.912	126.665						110.425	1056.94	189.951	117.259
89.005	349.709	653.917	132.361
89.669	334.351	684.122	117.003
90.333	314.715	681.929	97.367
90.997	308.536	665.659	91.188
91.661	309.489	667.192	92.141
92.326	320.689	691.625	103.341
92.99	343.324	715.816	125.976
93.654	361.951	748.139	144.603
94.318	385.405	797.92	168.057
94.982	394.975	850.268	177.627
95.647	396.12	910.708	178.772
96.311	397.566	965.954	180.218
96.975	408.676	1017.61	191.328
97.639	432.491	1094.67	215.143
98.303	450.217	1207.68	232.869
98.968	485.617	1328.19	268.269
99.632	502.249	1305.33	284.901
100.296	502.208	1226.69	284.86
100.96	473.566	1148.04	256.218
101.625	434.384	1140.83	217.036
102.289	433.984	1242.48	216.636
102.953	450.004	1408.46	232.656
103.617	452.451	1574.46	235.103
104.281	447.904	1600.35	230.556	midline BM
104.946	409.398	1466.3	192.05
105.61	357.293	1347.79	139.945
106.274	291.284	1310.76	73.936
106.938	254.794	1305.02	37.446
107.602	243.709	1215.08	26.361
108.267	235.975	1120.06	18.627
108.931	233.943	1093.26	16.595
109.595	239.25	1144.52	21.902
110.259	265.709	1134.31	48.361
110.924	272.817	1025.52	55.469
111.588	280.274	974.14	62.926
112.252	267.466	904.014	50.118
112.916	251.17	801.077	33.822
113.58	235.304	702.448	17.956
114.245	220.291	614.298	2.943
114.909	208.024	538.776	-9.324
115.573	205.084	498.241	-12.264
116.237	197.768	501.854	-19.58
116.901	195.672	520.55	-21.676
117.566	208.252	562.571	-9.096
118.23	208.235	598.795	-9.113
118.894	210.189	598.75	-7.159
119.558	197.978	590.2	-19.37
120.222	202.021	609.908	-15.327
120.887	198.011	655.657	-19.337
121.551	201.461	672.798	-15.887
122.215	199.978	664.242	-17.37
122.879	205.945	660.145	-11.403
123.544	196.181	696.118	-21.167
124.208	203.052	734.784	-14.296
124.872	201.681	741.56	-15.667
125.536	200.967	704.835	-16.381
126.2	206.239	657.361	-11.109
126.865	222.976	664.51	5.628
127.529	225.507	676.422	8.159
128.193	224.771	630.262	7.423
128.857	221.554	590.57	4.206
129.521	228.844	598.186	11.496
130.186	227.905	603.13	10.557
130.85	234.584	606.695	17.236
131.514	243.954	647.007	26.606
132.178	238.32	683.761	20.972
132.843	221.984	702.842	4.636
133.507	214.479	684.18	-2.869
134.171	214.829	657.189	-2.519
134.835	215.865	599.888	-1.483
135.499	209.524	551.577	-7.824
136.164	203.378	541.388	-13.97
136.828	201.781	562.519	-15.567
137.492	213.207	600.571	-4.141
138.156	216.319	602.41	-1.029
138.82	218.469	567.486	1.121
139.485	220.81	542.221	3.462
140.149	220.763	518.777	3.415
140.813	223.044	508.856	5.696
141.477	223.169	524.938	5.821
142.142	219.693	543.119	2.345
142.806	220.273	541.245	2.925
143.47	227.473	549.082	10.125
144.134	235.106	589.788	17.758
144.798	244.358	620.722	27.01
145.463	249.646	634.197	32.298
146.127	244.23	647.304	26.882
146.791	250.483	671.475	33.135
147.455	251.691	691.777	34.343
148.119	244.842	714.407	27.494
148.784	242.104	681.869	24.756
149.448	223.562	638.43	6.214
150.112	226.626	612.022	9.278
150.776	231.835	590.767	14.487
151.44	234.431	586.461	17.083
152.105	237.889	594.778	20.541
152.769	240.125	632.175	22.777
153.433	238.837	663.025	21.489
154.097	244.483	676.79	27.135
154.762	248.473	691.617	31.125
155.426	249.586	708.742	32.238
156.09	244.382	718.974	27.034
156.754	247.05	734.282	29.702
157.418	246.664	742.527	29.316
158.083	241.092	729.962	23.744
158.747	240.483	686.923	23.135
159.411	228.163	648.231	10.815
160.075	218.312	635.747	0.964
160.739	218.315	645.894	0.967
161.404	216.214	672.609	-1.134
162.068	212.754	719.556	-4.594
162.732	205.799	754.128	-11.549
163.396	209.22	797.197	-8.128
164.061	201.491	837.675	-15.857
164.725	197.179	873.567	-20.169
165.389	186.926	842.989	-30.422
166.053	188.531	837.012	-28.817
166.717	182.375	888.436	-34.973
167.382	192.971	935.054	-24.377
168.046	209.033	935.528	-8.315	right coelomic BM
168.71	220.903	897.772	3.555
169.374	228.442	871.829	11.094
170.038	233.29	844.093	15.942
170.703	233.514	814.517	16.166
171.367	230.807	804.962	13.459
172.031	224.036	817.977	6.688
172.695	234.757	800.803	17.409
173.36	228.266	792.463	10.918
174.024	238.868	827.082	21.52
174.688	253.546	848.581	36.198
175.352	261.715	854.604	44.367
176.016	270.699	864.192	53.351
176.681	278.295	873.226	60.947
177.345	277.799	860.077	60.451
178.009	277.389	844.433	60.041
178.673	274.943	821.801	57.595
179.337	269.796	782.068	52.448
180.002	262.284	751.585	44.936
180.666	267.842	735.905	50.494
181.33	274.784	722.781	57.436
181.994	286.259	727.997	68.911
182.658	295.082	740.577	77.734
